# Supplementary material for: Relationship between incident types and impact on patients in drug name errors: a correlational study
Source: PubMed Central journal article supplement (PMC4729157; doi:10.1186/s40780-015-0011-x), 2015-03-10
Supplement: 40780_2015_11_MOESM1_ESM.pdf [file 40780_2015_11_MOESM1_ESM.pdf]

**Table 1 Classification method into (1) - (3) categories and actual cases of preparation errors**

| Error category                           | Classification method                                                                                                                                                                                                                                                                                                                                                                                                                                                                                            |
|------------------------------------------|------------------------------------------------------------------------------------------------------------------------------------------------------------------------------------------------------------------------------------------------------------------------------------------------------------------------------------------------------------------------------------------------------------------------------------------------------------------------------------------------------------------|
| <b>(1) Similarity of drug efficacy</b>   | <b>Both of correct drug and incorrect drug have the common efficacy in insurance adaptation.</b>                                                                                                                                                                                                                                                                                                                                                                                                                 |
| <b>(2) Similarity of drug name</b>       | <b>Trade names of both drugs according to Romanized Japanese satisfy one or more items in the following four items</b>                                                                                                                                                                                                                                                                                                                                                                                           |
|                                          | 1. Three or more letters from beginning are the same<br>2. Four or more letters from ending are the same<br>3. Two letters from beginning or three letters from ending are the same, and the numerical value of drug content is the same, too<br>4. Besides the above three items, both drug names have the commonality of five or more successive letters.<br>※ The letters expressed singly as “A”, “I”, “U”, “E”, “O”, “N” and the letters of “SHI”, “CHI”, “TSU” are defined as “two letters” exceptionally. |
| <b>(3) Similarity of drug appearance</b> | <b>Appearances of both drugs satisfy two or more items in the following three items</b>                                                                                                                                                                                                                                                                                                                                                                                                                          |
|                                          | 1. Colors of both drugs (tablets/capsules) are similar, and colors of both drug blister-packages are similar, too<br>2. Shapes of both drug blister-packages are similar, or arrangements of both drugs (tablets/capsules) are similar<br>3. Sizes of both drug blister-packages are similar (area ratio $\geq (0.9)^2 = 0.81$ , volume ratio $\geq (0.9)^3 = 0.73$ )                                                                                                                                            |

|                                                                         | Single similarity class                                                                                                                                                                                                                                          | Double similarity class                                                                                                                                                                                                                                                                                         | Triple similarity class                                                                                                                                                                                                                                                                                              |
|-------------------------------------------------------------------------|------------------------------------------------------------------------------------------------------------------------------------------------------------------------------------------------------------------------------------------------------------------|-----------------------------------------------------------------------------------------------------------------------------------------------------------------------------------------------------------------------------------------------------------------------------------------------------------------|----------------------------------------------------------------------------------------------------------------------------------------------------------------------------------------------------------------------------------------------------------------------------------------------------------------------|
| <b>(1) Similarity of drug efficacy</b>                                  | <b>error type (a)</b><br><b>error cases of (1) alone</b><br>Voltaren (25mg) ⇒ Loxoprofen (60mg)<br>Amoban (7.5mg) ⇒ Lendormin (0.25mg)                                                                                                                           | <b>error type (d)</b><br><b>error cases of (1) and (2)</b><br>Alfárol (1µg) ⇒ Onealfá (0.5µg)<br>● <u>A</u> /RU/FUA/RO/O/RU (1µg) ⇒ WA/N/ <u>A</u> /RU/FUA (0.5µg)<br>Constan (0.4mg) ⇒ Lexotan (1mg)<br>● KO/N/SU/ <u>T</u> A/N (0.4mg) ⇒ RE/KI/SO/ <u>T</u> A/N (1mg)                                         | <b>error type (g)</b><br><b>error cases of (1) and (2) and (3)</b><br>Bio-Three (1g) ⇒ Biofermin-R (1g)<br>● <u>B</u> I/O/SU/RI/I (1g) ⇒ <u>B</u> I/O/FUE/RU/MI/N·[R] (1g)<br>Ensure Liquid (250ml) ⇒ Ensure-H (250ml)<br>● <u>E</u> /N/ <u>S</u> HU/A LI/KI/DDO (250ml)<br>⇒ <u>E</u> /N/ <u>S</u> HU/A·[H] (250ml) |
| <b>(2) Similarity of drug name</b><br>● Drug name in Romanized Japanese | <b>error type (b)</b><br><b>error cases of (2) alone</b><br>Mucosta (100mg) ⇒ Mucodyne (250mg)<br>● <u>M</u> U/KO/SU/TA (100mg) ⇒ <u>M</u> U/KO/DA/I/N (250mg)<br>Decadron (0.5mg) ⇒ Depas (0.5mg)<br>● <u>D</u> E/KA/DO/RO/N (0.5mg) ⇒ <u>D</u> E/PA/SU (0.5mg) | <b>error type (f)</b><br><b>error cases of (2) and (3)</b><br>Calonal (200mg) ⇒ Caltan (500mg)<br>● <u>K</u> A/RO/NA/A/RU (200mg) ⇒ <u>K</u> A/RU/TA/N (500mg)<br>Caloryl Jelly (40.496%) ⇒ Argamate Jelly (20%)<br>● <u>K</u> A/RO/RI/I/RU <u>Z</u> E/RI/I (40.496%)<br>⇒ A/A/GA/ME/I/TO <u>Z</u> E/RI/I (20%) |                                                                                                                                                                                                                                                                                                                      |
| <b>(3) Similarity of drug appearance</b>                                | <b>error type (c)</b><br><b>error cases of (3) alone</b><br>Zyloric (100mg) ⇒ Calonal (200mg)<br>Lasix (40mg) ⇒ Warfarin (1mg)                                                                                                                                   | <b>error type (e)</b><br><b>error cases of (3) and (1)</b><br>Proheparum (combination) ⇒ EPL (250mg)<br>Bonalon (35mg) ⇒ Actonel (17.5mg)                                                                                                                                                                       |                                                                                                                                                                                                                                                                                                                      |
| <b>(1) Similarity of drug efficacy</b>                                  | <b>error type (a)</b><br><b>error cases of (1) alone</b>                                                                                                                                                                                                         |                                                                                                                                                                                                                                                                                                                 |                                                                                                                                                                                                                                                                                                                      |

The underline represents the common points between correct drug and incorrect drug.
